# Supplementary material for: The presence of rNTPs decreases the speed of mitochondrial DNA replication
Source: PubMed Central journal article supplement (PMC5895052; doi:10.1371/journal.pgen.1007315), 2018-03-30
Supplement: pgen.1007315.s006.pdf [file pgen.1007315.s006.pdf]

| Description                                        | Name and reference                             | Sequence (5'-3')                                                                          |
|----------------------------------------------------|------------------------------------------------|-------------------------------------------------------------------------------------------|
| <b>Primers for double stranded Southern probes</b> |                                                |                                                                                           |
| Mouse mtDNA 16S rRNA                               | 1953 Reverse (Tynnismaa et al 2004)            | GAG GTG ATG TTT TTG GTA AAC AGG CGG GGT                                                   |
|                                                    | 1409 Forward                                   | GGT AGA GGT GAA AAG CCT AAC GAG CTT GG                                                    |
| <b>Strand specific probes</b>                      |                                                |                                                                                           |
| Cytochrome oxidase subunit II H1                   | Yao Yang et al 2002, 7591-7618                 | TTCTAGGACAATGGGCATAAAGCTATGGTT                                                            |
| Cytochrome oxidase subunit II L2                   | Yao Yang et al 2002, 7591-7618                 | AACCATAGCTTTATGCCATTGTCCTAGAA                                                             |
| D-loop H2                                          | Yao Yang et al 2002; 15,814-15,840             | CCATCGAGATGTCTTATTTAAGGGGAA                                                               |
| D-loop L2                                          | Yao Yang et al 2002; 15,814-15,840             | TTCCCTTAAATAAGACATCTCGATGG                                                                |
| 16S L3                                             | nt 1409 Bibb et al 1981                        | GGTAGAGGTGAAAAGCCTAACGAGCTTGGT                                                            |
| 16S H3                                             | nt 1409 Bibb et al 1981                        | ACCAAGCTCGTTAGGCTTTTCACCTCTACC                                                            |
| ND4 L4                                             | nt 10424 Bibb et al 1981                       | TAACGTACTACAAAACTCTACATCTCAAT                                                             |
| ND4 H4                                             | nt 10424 Bibb et al 1981                       | ATTGAGATGTAGAGTTTTTGTAGTACGTTA                                                            |
| ND6 L5                                             | nt 13730 Bibb et al 1981                       | ACTTCATCATAATAATTAAGCACACAAATT                                                            |
| ND6 H5                                             | nt 13730 Bibb et al 1981                       | AATTTGTGTGCTTAATTATTATGATGAAGT                                                            |
| ND1 L6                                             | nt 3131 Bibb et al 1981                        | CTCACTATTCGGAGCTTTACGAGCCGTAGC                                                            |
| ND1 H6                                             | nt 3131 Bibb et al 1981                        | GCTACGGCTCGTAAAGCTCCGAATAGTGAG                                                            |
| <b>Incorporation primers pBluescript and M13</b>   |                                                |                                                                                           |
|                                                    | Primer 682 (Makarova DNA repair 2014)          | TATCGATAAGCTTGATATCGAATTCCT                                                               |
|                                                    | Primer M13                                     |                                                                                           |
| <b>Oligos for bypass of ribonucleotides</b>        |                                                |                                                                                           |
|                                                    | 25 nt primer                                   | ATAGGGGTATGCCTACTTCCAACCTC                                                                |
|                                                    | 70ntNDG                                        | GAGGGGTATGTGATGGGAGGGCTAGGATATGAGGT<br>GAGTT <b>G</b> AGTGGAGTTGGAAGTAGGCATACCCCTAT       |
|                                                    | 70ntNDT                                        | GAGGGGTATGTGATGGGAGGGCTAGGATATGAGGT<br>GAGTT <b>T</b> AGTGGAGTTGGAAGTAGGCATACCCCTAT       |
|                                                    | 70ntNDA                                        | GAGGGGTATGTGATGGGAGGGCTAGGATATGAGGT<br>GAGTT <b>A</b> AGTGGAGTTGGAAGTAGGCATACCCCTAT       |
|                                                    | 70ntNDC                                        | GAGGGGTATGTGATGGGAGGGCTAGGATATGAGGT<br>GAGTT <b>C</b> AGTGGAGTTGGAAGTAGGCATACCCCTAT       |
|                                                    | 70ntrGTP                                       | GAGGGGTATGTGATGGGAGGGCTAGGATATGAGGT<br>GAGTT <b>(G)</b> AGTGGAGTTGGAAGTAGGCATACCCCTAT     |
|                                                    | 70ntrUTP                                       | GAGGGGTATGTGATGGGAGGGCTAGGATATGAGGT<br>GAGTT <b>(U)</b> AGTGGAGTTGGAAGTAGGCATACCCCTAT     |
|                                                    | 70ntrATP                                       | GAGGGGTATGTGATGGGAGGGCTAGGATATGAGGT<br>GAGTT <b>(A)</b> AGTGGAGTTGGAAGTAGGCATACCCCTAT     |
|                                                    | 70ntrCTP                                       | GAGGGGTATGTGATGGGAGGGCTAGGATATGAGGT<br>GAGTT <b>(C)</b> AGTGGAGTTGGAAGTAGGCATACCCCTAT     |
|                                                    | 70nt2rNTPs                                     | GAGGGGTATGTGATGGGAGGGCTAGGATATGAGGT<br>GAGT <b>(UG)</b> AGTGGAGTTGGAAGTAGGCATACCCCTAT     |
|                                                    | 70nt3rNTPs                                     | GAGGGGTATGTGATGGGAGGGCTAGGATATGAGGT<br>GAG <b>(UUG)</b> AGTGGAGTTGGAAGTAGGCATACCCCTA<br>T |
|                                                    | 70nt4rNTPs                                     | GAGGGGTATGTGATGGGAGGGCTAGGATATGAGGT<br>GA <b>(GUUG)</b> AGTGGAGTTGGAAGTAGGCATACCCCTA<br>T |
| <b>Oligos for sequencing of bypass</b>             |                                                |                                                                                           |
| BIOHindIII                                         | Biotinylated primer with internal HindIII site | GTAGAAGCTTGATCTACGAGAGATACTATTAGCTATA<br>GGGGTATGCCTACTTCCAACCTC                          |
| For70ntseq                                         | PCR forward primer                             | GTAGAAGCTTGATCTACGAGAG                                                                    |
| Rev70ntseq                                         | PCR reverse primer                             | GAGGGGTATGTGATGGGAGGGCTAGG                                                                |
| M13 rev (-49)                                      | Sequencing primer for pUC19                    | GAGCGGATAACAATTCACACAGG                                                                   |
